# Supplementary material for: Anatomic fat depots and cardiovascular risk: a focus on the leg fat using nationwide surveys (KNHANES 2008–2011)
Source: PubMed Central journal article supplement (PMC5405479; doi:10.1186/s12933-017-0536-4), 2017-04-26

A

Framingham CVD score, tertile

□ T1 □ T2 ■ T3

P<0.001

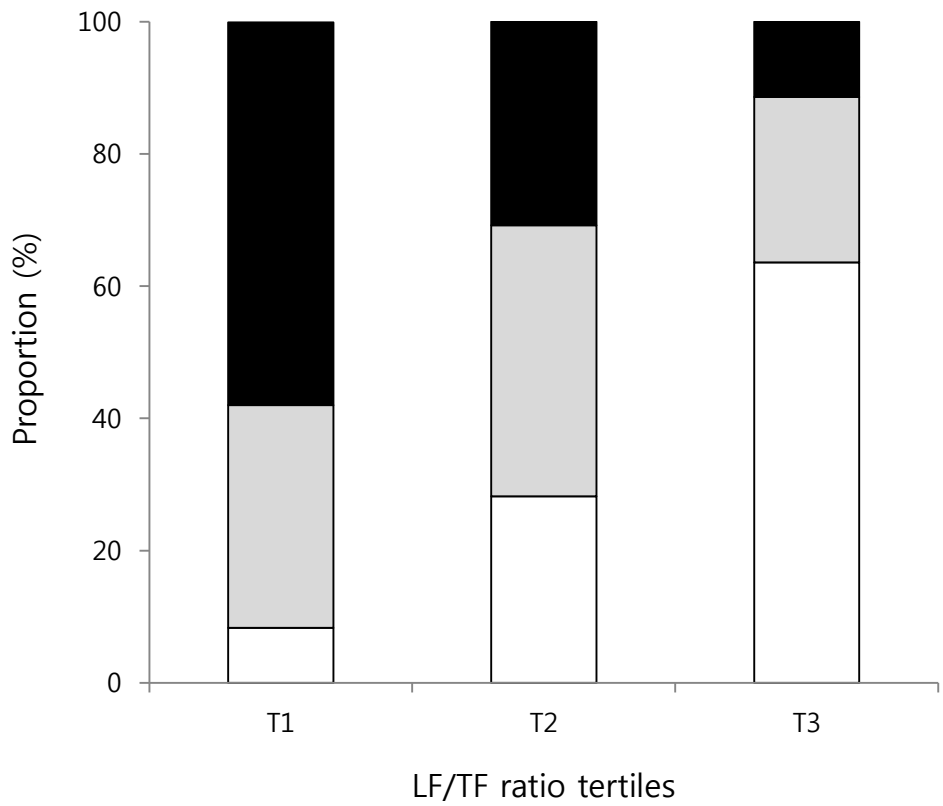

B

Korean CHD score, tertile

□ T1 □ T2 ■ T3

P<0.001

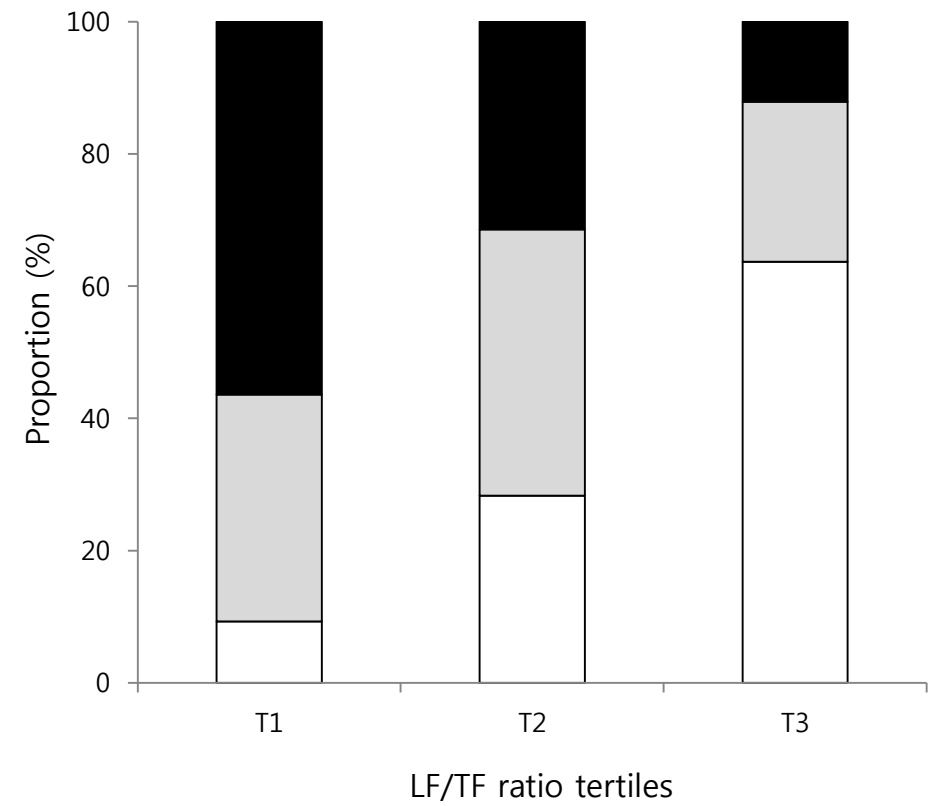

Supplement: 12933_2017_536_MOESM1_ESM.pdf [file 12933_2017_536_MOESM1_ESM.pdf]
