# Supplementary material for: Anatomic fat depots and cardiovascular risk: a focus on the leg fat using nationwide surveys (KNHANES 2008–2011)
Source: Springer Nature journal article supplement (doi:10.1186/s12933-017-0536-4), 2017-04-25

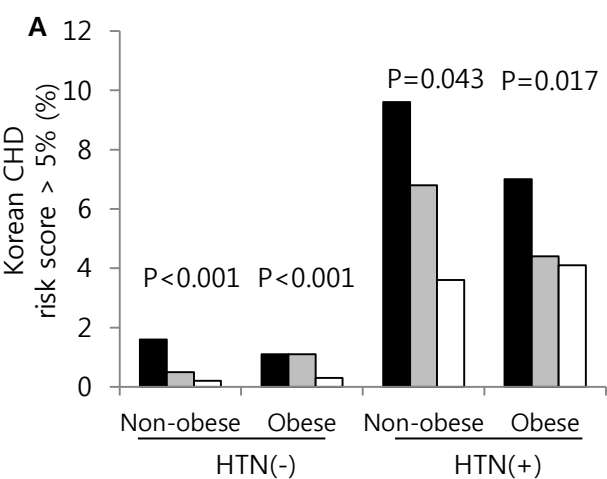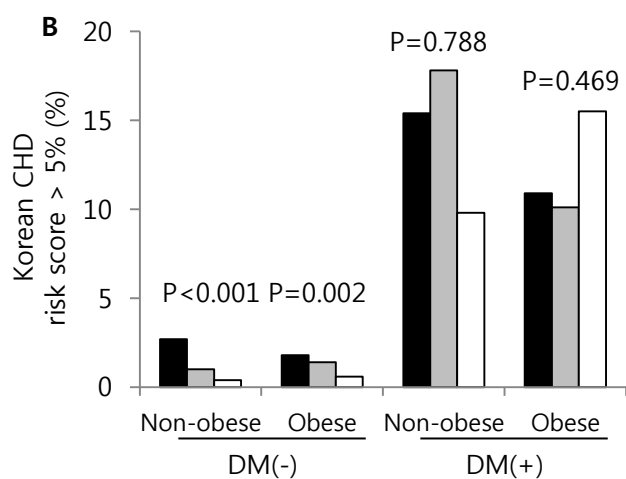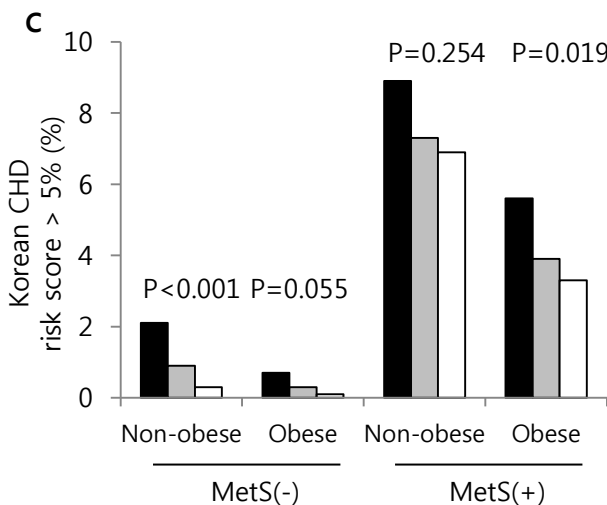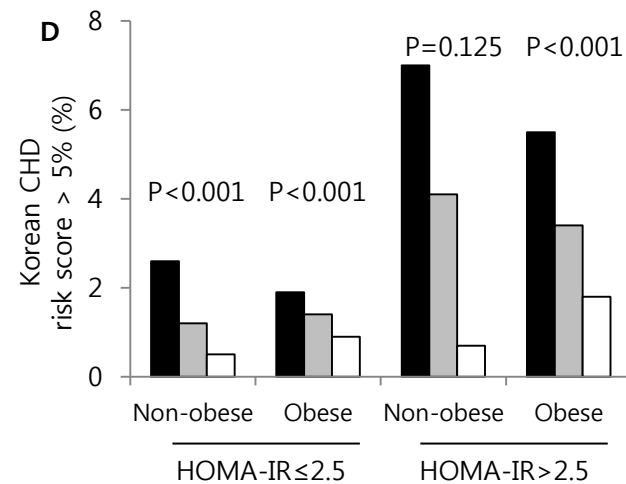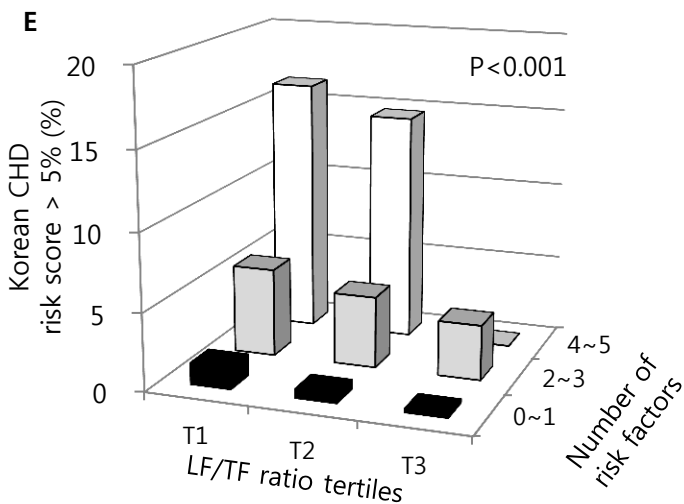

Supplement: MOESM4 [file 12247276]
